# Supplementary material for: Nitrifier abundance and diversity peak at deep redox transition zones
Source: PubMed Central journal article supplement (PMC6572806; doi:10.1038/s41598-019-44585-6), 2019-06-14
Supplement: 41598_2019_44585_MOESM1_ESM.pdf [file 41598_2019_44585_MOESM1_ESM.pdf]

## Title

Nitrifier abundance and diversity peak at deep redox transition zones

## Authors

Rui Zhao<sup>1,2,†,\*</sup>, Bjarte Hannisdal<sup>2</sup>, Josè M. Mogollon<sup>3</sup> & Steffen L. Jørgensen<sup>2,\*</sup>

## Affiliations

<sup>1</sup> Department of Biology, University of Bergen, Bergen, Norway

<sup>2</sup> K.G. Jebsen Centre for Deep Sea Research, Department of Earth Science, University of Bergen, Bergen, Norway

<sup>3</sup> Institute of Environmental Sciences (CML), Leiden University, Leiden, Netherlands

<sup>†</sup> Present address: School of Marine Science and Policy, University of Delaware, Lewes, DE, 19958, USA

\* **Correspondent authors:** [steffen.jorgensen@uib.no](mailto:steffen.jorgensen@uib.no) or [ruizhao@udel.edu](mailto:ruizhao@udel.edu)

## Supplementary Materials

### Flux calculations

Fluxes were calculated using Fick's first law of diffusion:  $J = \varphi \times D_s \times \delta[\text{O}_2]/\delta z$

Where,  $J$  is the flux;  $\varphi$  is the measured sediment porosity;  $D_s$  is sedimentary diffusion coefficient for solutes ( $\text{m}^2 \text{yr}^{-1}$ ) calculated using the R package *marelac*<sup>1</sup>;  $z$  is the sediment depth below the seafloor (m); and  $\delta[\text{O}_2]/\delta z$  equals the change in solute concentration gradient ( $\text{mmol m}^{-3}$ ), which were calculated from the nearby three data points.

### Quantitative PCR (qPCR)

All qPCR assays were performed on a StepOnePlus real-time PCR platform (Life Technologies, Carlsbad, CA, USA) using the QuantiTect SybrGreen PCR kit (QIAGEN). Each reaction (20  $\mu\text{l}$ ) contained 1 $\times$  QuantiTect SybrGreen PCR master mixture, 0.5  $\mu\text{M}$  forward and reverse primer and 1  $\mu\text{l}$  DNA template. For all qPCR assays, product specificity was verified via dissociation curves, and multiple blanks were included in each run (none of which amplified). Detection limit was 10 gene copies per reaction. Quantification efficiency was estimated to 85-98% and all  $r$  values were above 99%. Samples and standards were analyzed in triplicate. Results were normalized to copy numbers per gram wet sediment ( $\text{copies g}^{-1} \text{ws}$ ) for all genes analyzed.

Standard curves for archaeal 16S rRNA and AOA *amoA* genes were obtained using the AOA fosmid 54d9<sup>2</sup>. For bacterial 16S rRNA genes, the standard used was genomic DNA obtained from *Escherichia coli*. For the reminding genes, PCR amplicons were obtained using environmental DNA as template using primers and thermal conditions identical to those used in

the PCR screening. Environmental DNA used for standard preparation was obtained from the following locations: AOB *amoA*, NOB *nxB*, and denitrifier *narG* genes from North Pond sediment (site 4A, section 1H-1), *nirS* and *nirK* from Arctic permafrost soil (Courtesy of Dr. Antje Gittle). Resulting amplicons were cloned using the StrataClone PCR Cloning Kit (Agilent Technologies, USA) according to the manufacturer's instructions. Positive clones were amplified using the vector primers M13F/M13R, to generate linear qPCR standards. All standard DNA concentrations were measured using Bio-analyzer (DNA 1000 chips, Agilent Technologies) and serially diluted to  $10\text{-}10^6$  copies  $\mu\text{l}^{-1}$  for subsequent quantification.

### **Preparation of Amplicon libraries**

The amplification of 16S rRNA genes was performed in duplicate reactions using the primers Uni519F (5'-CAGCMGCCGCGGTAA-3') and 1392R (5'-ACGGGCGGTGWGTRC-3') for samples from 4A, and Uni519F and 806R (5'-GACTACHVGGGTATCTAATCC-3') for 3E. Each reaction (25  $\mu\text{l}$ ) contained the following: 1 $\times$  HotStar Taq<sup>®</sup> Master Mix (Qiagen, Hilden, Germany), 1.2  $\mu\text{M}$  of each primer and 2  $\mu\text{l}$  template DNA. PCR thermal condition was as follows: 95 °C for 5 min in the initial denaturation and polymerase activation, followed by 25-33 cycles of 95 °C for 30 s, 58 °C for 45 s, 72 °C for 1 min, and a final elongation of 72 °C for 10 min. The PCR cycle number at this stage was optimized individually for each sample in order to minimize PCR bias (Table S4). The duplicate PCR products were then pooled and purified using GenElute PCR Clean-up kit (Sigma-Aldridge). In order to add the adaptor sequences, a second-round duplicate PCR was performed (7 cycles) under the same thermal condition with the same primers as the first-round PCR but elongated with adapters and the forward primer containing a 12-bp error-correcting barcode unique to each sample<sup>3</sup>. Resulting amplicons were purified again, using AMPure XP (Beckman Coulter) following the manufacturer's protocol (bead-to-sample ratio 7:10) and the concentration and quality were controlled by 1% agarose gel inspection, Quantus Fluorometer (Promega) and Bio-analyzer (DNA 1000 chips, Agilent Technologies). All purified amplicons were pooled in a 1:1 ratio based on DNA concentration and sequenced using multiplex GS FLX plus pyrosequencing (flow pattern A) for the samples in 4A, and using Ion Torrent Personal Genome Machine (PGM) (Life Technology, USA) for the samples in 3E.

### **Filtering and noise removal from amplicon sequencing data**

The quality filtering and clustering of reads were performed using the USEARCH and UPARSE packages<sup>4,5</sup>. Firstly, reads in each sample were quality filtered and trimmed to 220 bp using the '-fastq\_filter' command using options '-fastq\_trunclen 220' and '-fastq\_maxee 1'. Chimeric

sequences were detected and removed with the '-uchime\_ref' command using the Gold database as reference (available from 'http://drive5.com/uchime/gold'). A total of 780,489 sequences from site 3E and 179,693 sequences from 4A were available for further down-stream analysis after initial filtering.

*De novo* OTU clustering was performed at a cutoff of 97% nucleotide sequence similarity using the '-cluster\_otus' command in UPARSE. Potential contaminants (i.e. OTUs detected in the drill mud, fluorescent microsphere bag, and blank kit extractions) in the datasets were removed using the strategy described in <sup>6</sup>. Taxonomic classification of OTUs was performed using the program CREST with the SilvaMod reference database <sup>7</sup>, applying the Lowest Common Ancestor algorithm. All samples were down sampled to 1,000 reads prior to diversity (richness) comparison between samples (Fig. 4a, c).

### **Clustering analysis**

The similarity of samples of different depths in each core were calculated in the R package *Vegan* <sup>8</sup>, using the Bray-Curtis distance, based on the relative abundances of OTUs, and visualized using the R package *dendextend* <sup>9</sup>.

### **Reconstruction of phylogenetic trees**

To verify the taxonomy of the OTUs of putative AOB and NOB, OTUs from each functional group were aligned in MAFFT <sup>10</sup>, along with the 16S rRNA gene sequences of cultured species and their closest relatives from the NCBI database. Maximum-likelihood phylogenetic trees were reconstructed using RAxML <sup>11</sup>, by applying the Generalized Time-Reversible model and the gamma approximation as the rate heterogeneity model (GTRGAMMA). Support values were determined using 100 non-parametric bootstrap replicates (Fig. S5a, b).

### **Reaction-Transport modeling**

The model simulations assume that the geochemical profiles, including all implicit reactive intermediates, are near steady state. It includes the effects of compaction via an exponentially decreasing porosity equation, and biologically induced mixing via diffusive (bioturbation) and nonlocal (bioirrigation) transport terms, however the latter two can be disregarded in this study. Organic matter is assumed to consist of a continuum of reactive components (the reactive continuum model <sup>12</sup>). Aerobic respiration ( $R_1$ ) was considered as the most favorable pathway of organic matter consumption. The inhibition concentration of O<sub>2</sub> for heterotrophic denitrification ( $h_1$ ) was set to vary over a wide range (from 10 nM to 50 μM). Organic matter degradation

coupled to manganese oxide reduction ( $R_3$ ) was inhibited by denitrification. The two secondary reactions, namely nitrification ( $R_4$ ) denotes the complete oxidation of  $\text{NH}_4^+$  to  $\text{NO}_3^-$ , and Mn oxidation ( $R_5$ ), was represented through bimolecular kinetics. The five reactions between the six species are listed in the Supplementary Table S7. The C/N stoichiometry of the degraded organic matter was assumed to be similar to previous reports from the shallow sediment ( $\sim 10$ ; Ziebis, et al. <sup>13</sup>). The boundary conditions at the sediment-water interface (SWI) and sediment-basement interface (SBI) were taken from previous reports <sup>13,14</sup> (Table S2). The model parameters (Table S3) were evaluated and optimized by comparing the model results to the measured profiles of organic matter, oxygen, and nitrate.

### **Cell-specific reaction rates calculation**

Cells-specific reaction rates were calculated for aerobic heterotrophs, nitrifiers, and denitrifiers, by dividing the estimated bulk volumetric reaction rates by the corresponding abundances of the relevant functional genes quantified by qPCR.

This calculation was made under the following two critical assumptions: 1) the functional gene abundance represents the quantity of intact cells; and 2) all cells are equally active and differences in kinetics due to variation in substrate availability at different depths are negligible. While it is difficult to validate these assumptions, we note that the oxic nature of the environment makes it unlikely that extracellular DNA will persist over longer periods of time. We also note that the narrow range of substrate concentration and extremely low diversity of microbial communities, e.g. one Nitrosopumilales OTU detected in most of the deeper horizons at 4A, legitimate comparable metabolic kinetics between nitrifying cells, as also justified by Jørgensen and Marshall <sup>15</sup>.

The abundance of nitrifiers, for each depth, was taken as the sum of AOA and AOB *amoA* gene copies. The number of *narG* gene copies represented denitrifier abundances. While this gene is also involved in the first step in the DNRA process, the lack of any apparent DNRA utilizes in the community profile and the unsuccessful detection of the diagnostic gene *nrfA*, catalyzing the second step lead us to argue that our assumption is reasonable. Aerobic heterotrophs were represented by the total cell abundances (archaeal + bacterial 16S rRNA gene copies) and subtracting the putative autotrophic nitrifiers (AOA, AOB, and NOB). Although this might still overestimate the abundance of heterotrophic cells, the bias inflicted by this assumption is likely to be less than one order of magnitude. It is also worth noting that the bulk oxygen respiration rates reported here only account for the part consumed by aerobic organic matter degradation i.e. it does not include the oxygen consumption by nitrification. We also include a calculation of the

cell specific oxygen consumption, which have been corrected for potential differences in gene copy numbers (assuming one copy for Archaea and 3 for Bacteria) and is displayed in Fig. S3.

All cell-specific rates were normalized to femtomoles of electrons ( $e^-$ ) transferred per cell per day, assuming that six electrons are accepted by oxidizing a molecule of  $\text{NH}_4^+$  to  $\text{NO}_2^-$ , five electrons are donated to denitrifiers during reduction of  $\text{NO}_3^-$  to  $\text{N}_2$ . In addition, four electrons are accepted by reducing a molecule of  $\text{O}_2$ , following ref. <sup>16</sup>.

Cell-specific rates of nitrifiers were translated into cell-specific carbon metabolic rates (in unit of  $\text{g C (g C)}^{-1} \text{ h}^{-1}$ ), assuming that one mole carbon is fixed at the expense of 10 mole of ammonium oxidized <sup>17,18</sup>, and that each cell on average weights 14 fg.

## Supporting Figures

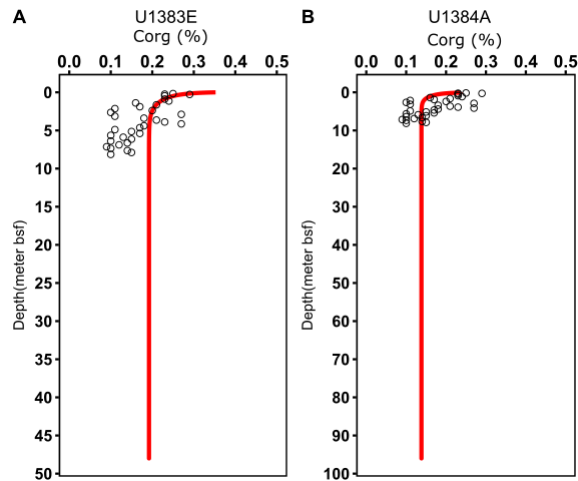

**Fig. S1. Organic carbon content.** Circles represent measured values of organic carbon in gravity core GeoB13507 from North Pond <sup>13</sup>, while lines denote the simulated values in the sediments from site 3E (A) and 4A (B).

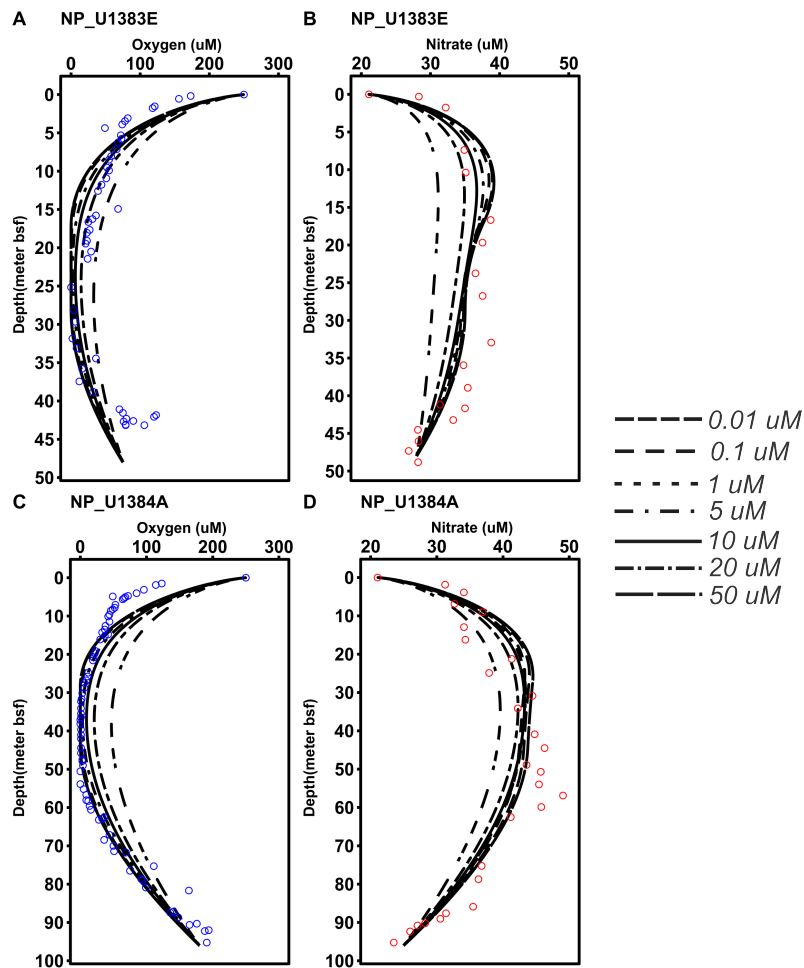

**Fig. S2. Simulated geochemical profiles.** Showing oxygen (A, C) and nitrate (B, D) when different inhibition concentrations of O<sub>2</sub> were used. Circles are measured values and lines represent the simulated values with different inhibition concentrations of O<sub>2</sub> (0.01 – 50 μM) while all other parameters were kept constant.

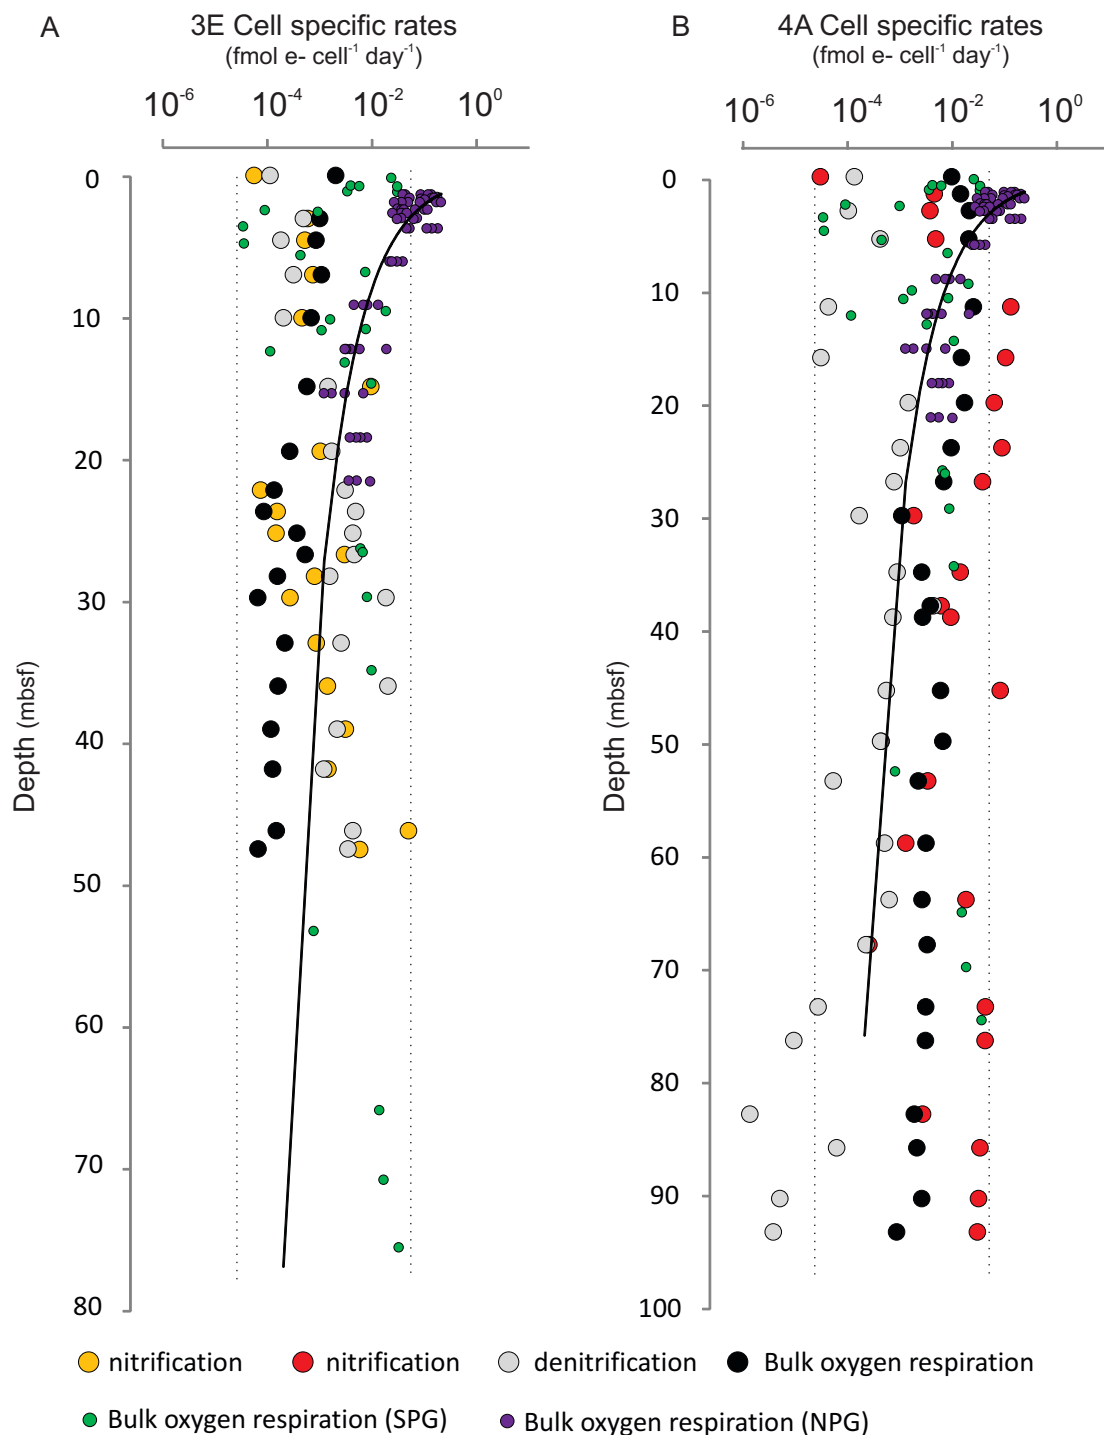

**Fig. S3. Cell specific reaction rates.** Estimated cell specific reaction rates at site 3E (A) and 4A (B) for nitrification (yellow and red at site 3E and 4A, respectively), bulk oxygen consumption (black) and denitrification (grey). In addition bulk oxygen respiration estimates from the North Pacific Gyre (NPG) (Røy et al., 2012) is added (purple) along with a power-law trend-line for this data (solid line). Further, bulk oxygen respiration estimates from the South Pacific Gyre (SPG) (D'Hondt et al., 2015) are implemented (green circles) and the upper and lower boundary for this dataset is highlighted (vertical dashed lines). Note that cell specific oxygen respiration values are corrected for multiple 16S rRNA copies per genome as opposed to that displayed in Fig. 1.

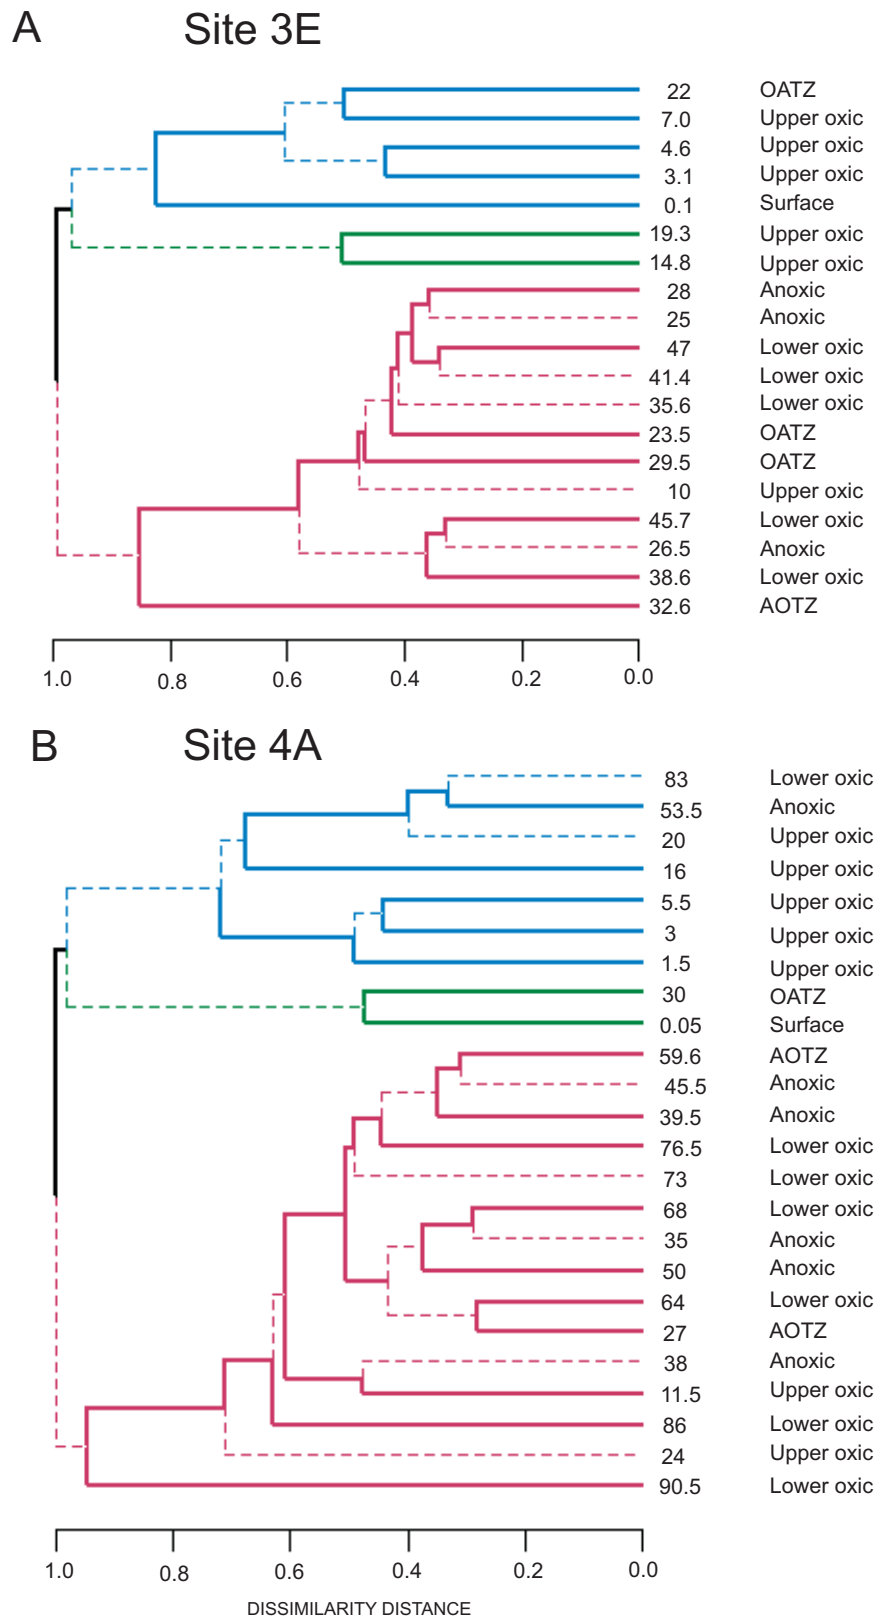

**Fig. S4. Cluster analysis of total community structure.** Bray-Curtis dissimilarity distances based on the relative abundance of each OTU at site 3E (A) and 4A (B). Different colors identify significant clustering ( $p = 0.05$ ). Number at end of branches is depth in meters below seafloor. Dashed lines represent distinct branches. Oxygen regimes are indicated after each branch and divided into an upper and lower oxic zone, the anoxic zone, the oxic-anoxic transition zone (OATZ) and the anoxic-oxic transition zone (AOTZ).



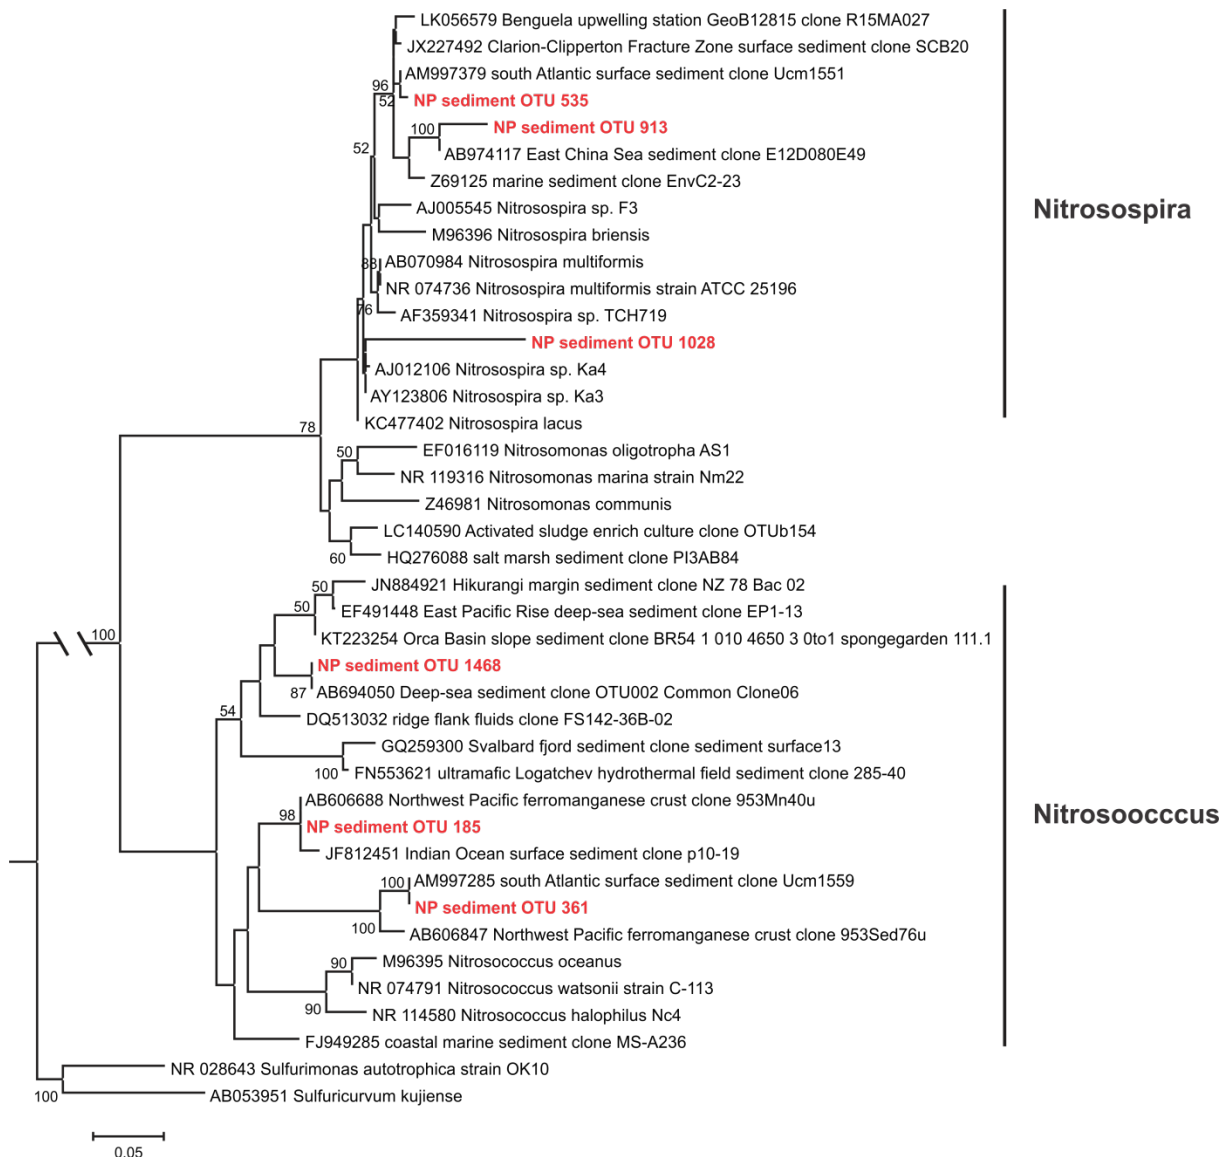

**Figure S5a. Phylogenetic tree of Ammonia-Oxidizing Bacteria.** Representative OTUs, based on partial 16S rRNA gene sequences, recovered from North Pond are shown in bold red and isolated strains shown in bold. The tree was reconstructed using the maximum-likelihood algorithm implemented in RAxML, by applying the Generalized Time-Reversible model and the gamma approximation as the rate heterogeneity model (GTRGAMMA).

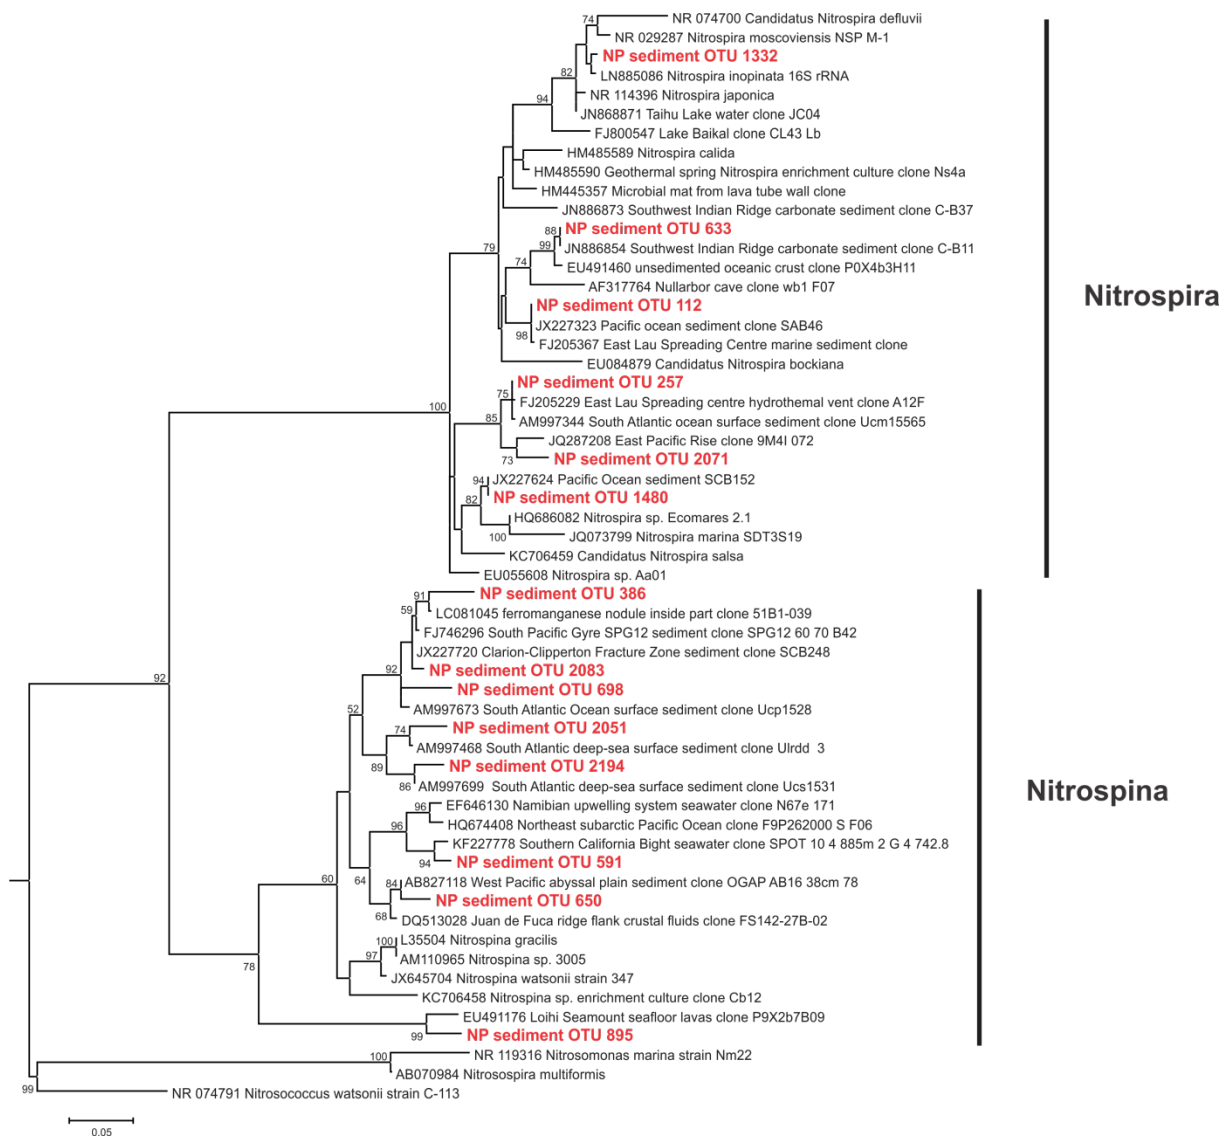

**Figure S5b. Phylogenetic tree of Nitrite-Oxidizing Bacteria.** Representative OTUs, Based on partial 16S rRNA gene sequences, recovered from North Pond are shown in bold red and isolated strains shown in bold. The tree was reconstructed using the maximum-likelihood algorithm implemented in RAxML, by applying the Generalized Time-Reversible model and the gamma approximation as the rate heterogeneity model (GTRGAMMA).

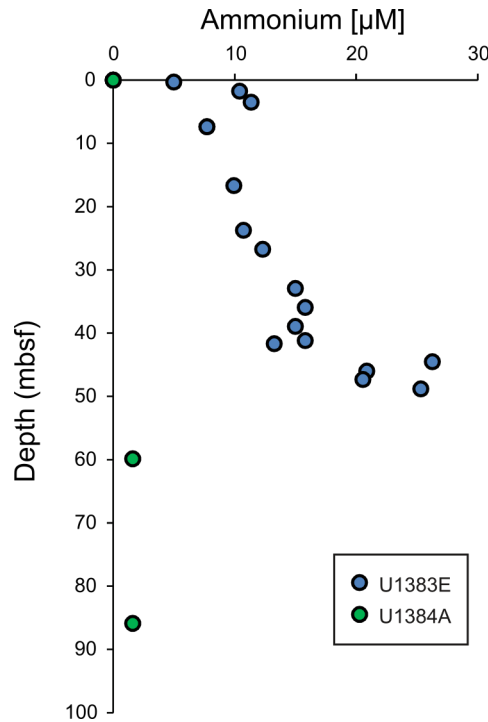

Fig. S6. Porewater ammonium profiles. Data from the two drill sites are from Ref. (19).

## Supporting Tables

Table S1. Fluxes of oxygen and nitrate

| Site | Sediment thickness (meter) | OATZ <sup>a</sup> depth | AOTZ <sup>b</sup> depth | Oxygen flux (mmol m <sup>-2</sup> yr <sup>-1</sup> ) |                                |                   |                 | Nitrate flux (mmol m <sup>-2</sup> yr <sup>-1</sup> ) |                   |
|------|----------------------------|-------------------------|-------------------------|------------------------------------------------------|--------------------------------|-------------------|-----------------|-------------------------------------------------------|-------------------|
|      |                            |                         |                         | Influx <sup>c</sup> (seawater)                       | Influx <sup>c</sup> (basement) | consumed (OATZ)   | consumed (AOTZ) | efflux (seawater)                                     | efflux (basement) |
| 3E   | 43.3                       | 21-25                   | 28-33                   | 1.0                                                  | 0.09                           | n.a. <sup>d</sup> | 0.04            | 0.047                                                 | 0.011             |
| 4A   | 94.7                       | 26-30                   | 54-58                   | 0.2                                                  | 0.07                           | 0.008             | 0.02            | 0.031                                                 | 0.010             |

<sup>a</sup>: OATZ: Oxidic-Anoxic Transition Zone.

<sup>b</sup>: AOTZ: Anoxic-Oxidic Transition Zone.

<sup>c</sup>: data from Orcutt et al. (2013).

<sup>d</sup>: not available (low spatial resolution of oxygen measurement).

Table S2. Chemical reactions and associated rate expressions

| Name                          | ID    | Reaction                                                                                                                                             | Rate expression                                                                  | Rate Unit                                      |
|-------------------------------|-------|------------------------------------------------------------------------------------------------------------------------------------------------------|----------------------------------------------------------------------------------|------------------------------------------------|
| Organic matter degradation    | $R_1$ | $(\text{CH}_2\text{O})(\text{NH}_4^+)_{1/10} + \text{O}_2 \rightarrow \text{HCO}_3^- + \text{H}^+ + 1/10 \text{NH}_4^+$                              | $\frac{CTOC * CO_2}{CO_2 + h_1}$                                                 | $\frac{\text{mmolC}}{1(\text{dry sediment})y}$ |
| Heterotrophic denitrification | $R_2$ | $(\text{CH}_2\text{O})(\text{NH}_4^+)_{1/10} + \text{NO}_3^- \rightarrow 2/5 \text{N}_2 + \text{CO}_2 + 1/10 \text{NH}_4^+ + 7/5 \text{H}_2\text{O}$ | $\frac{CTOC * CO_2 * \text{CN}03}{(CO_2 + h_1) * (CN03 + h_2)}$                  | $\frac{\text{mmolC}}{1(\text{dry sediment})y}$ |
| Manganese oxide reduction     | $R_3$ | $(\text{CH}_2\text{O})(\text{NH}_4^+)_{1/10} + 2 \text{MnO}_2 \rightarrow 1/10 \text{NH}_4^+ + \text{CO}_2 + 2 \text{Mn}^{2+} + 3\text{H}_2\text{O}$ | $\frac{CTOC * CO_2 * \text{CMn}02}{(CO_2 + h_1) * (CN03 + h_2) * (CMn02 + h_3)}$ | $\frac{\text{mmolC}}{1(\text{dry sediment})y}$ |
| Nitrification                 | $R_4$ | $\text{NH}_4^+ + 2\text{O}_2 \rightarrow \text{NO}_3^- + \text{H}^+ + \text{H}_2\text{O}$                                                            | $k_3 C_{O_2} C_{\text{NH}_4^+}$                                                  | $\frac{\mu\text{M N}}{y}$                      |
| Mn oxidation                  | $R_5$ | $2 \text{Mn}^{2+} + \text{O}_2 + 2 \text{H}_2\text{O} \rightarrow 2 \text{MnO}_2 + 4 \text{H}^+$                                                     | $K_4 C_{O_2} C_{\text{Mn}^{2+}}$                                                 | $\frac{\mu\text{M}}{y}$                        |

**Table S3.** Species and boundary conditions (BC) used in reaction-transport models

| Name                 | Symbol                       | BC SWI Type<br>(Unit)                        | BS SWI <sup>a</sup> |        | SBI <sup>b</sup> |      | Reaction Terms<br>( $\sum R_i$ ) |
|----------------------|------------------------------|----------------------------------------------|---------------------|--------|------------------|------|----------------------------------|
|                      |                              |                                              | Value               |        | Values           |      |                                  |
|                      |                              |                                              | 3E                  | 4A     | 3E               | 4A   |                                  |
| Total organic carbon | CH <sub>2</sub> O            | Flux (mol m <sup>-2</sup> yr <sup>-1</sup> ) | 0.0025              | 0.0021 | --               | --   | $-R_1-R_2-R_3$                   |
| Manganese oxide      | MnO <sub>2</sub>             | Flux (mol m <sup>-2</sup> yr <sup>-1</sup> ) | 2E-5                | 2E-5   | --               | --   | $-R_3$                           |
| Oxygen               | O <sub>2</sub>               | Concentration (μM)                           | 250                 | 250    | 80               | 190  | $-qR_1-2*R_4-R_5$                |
| Ammonium             | NH <sub>4</sub> <sup>+</sup> | Concentration (μM)                           | 0.01                | 0.01   | 0.01             | 0.01 | $1/10*q(R_1+R_2+R_3)-R_4$        |
| Nitrate              | NO <sub>3</sub> <sup>-</sup> | Concentration (μM)                           | 21                  | 21     | 28               | 23   | $-4/5*q*R_2+R_4$                 |
| Manganese            | Mn <sup>2+</sup>             | Concentration (μM)                           | 0.01                | 0.01   | 0.01             | 0.01 | $2*qR_3-2*R_5$                   |

$q = (1-\phi)/\phi$ ,  $\phi$  = porosity

<sup>a</sup>SWI: sediment-water interface

<sup>b</sup>SBI: sediment-basement interface

**Table S4.** Reaction-transport parameter values

| Name                                                       | Symbol        | Unit                              | 3E     | 4A     |
|------------------------------------------------------------|---------------|-----------------------------------|--------|--------|
| Solid burial velocity at sediment surface                  | $\omega$      | cm ky <sup>-1</sup>               | 0.94   | 2.00   |
| TOC apparent order of reaction                             | $\sigma$      | -                                 | 0.15   | 0.1    |
| Initial distribution of TOC reactivities                   | $\alpha$      | yr <sup>-1</sup>                  | 3000   | 200    |
| $R_4$ rate constant                                        | $k_3$         | μM <sup>-1</sup> yr <sup>-1</sup> | 15     | 1.5    |
| $R_5$ rate constant                                        | $k_4$         | μM <sup>-1</sup> yr <sup>-1</sup> | 20     | 20     |
| Bioturbation coefficient                                   | $D_{b,0}$     | cm yr <sup>-1</sup>               | 0      | 0      |
| Biomixing half depth                                       | $Z_{mix}$     | cm                                | 7      | 7      |
| Biomixing attenuation                                      | $Z_{att}$     | cm                                | 0.1    | 0.1    |
| $R_1$ O <sub>2</sub> inhibition concentration              | $h_1$         | μM                                | 0.5    | 0.5    |
| $R_2$ NO <sub>3</sub> <sup>-</sup> situation concentration | $h_2$         | μM                                | 50     | 300    |
| $R_3$ Mn <sup>2+</sup> situation concentration             | $H_3$         | mM                                | 30     | 30     |
| Bioirrigation coefficient                                  | $\alpha_0$    | yr <sup>-1</sup>                  | 0      | 0      |
| Porosity at sediment surface                               | $\phi_0$      | -                                 | 0.70   | 0.75   |
| Porosity at great depth                                    | $\phi_\infty$ | -                                 | 0.64   | 0.62   |
| Porosity attenuation coefficient                           | $\alpha_0$    | cm <sup>-1</sup>                  | 0.0003 | 0.0012 |

**Table S5.** Primers and thermal conditions

| Target genes                      | Primers      | Sequence (5'-3')             | PCR conditions                                                                                                                                                                                                                                                                          | qPCR | Ref. |
|-----------------------------------|--------------|------------------------------|-----------------------------------------------------------------------------------------------------------------------------------------------------------------------------------------------------------------------------------------------------------------------------------------|------|------|
| Bacterial SSU rRNA gene           | Bac341f      | CCTACGGGWGGCWGCA             | 95°C for 15 min, 40× (95°C for 15 s, 58°C for 30 s, 72°C for 30 s)                                                                                                                                                                                                                      | +    | 19   |
|                                   | Uni518r      | ATTACCGCGGCTGCTGG            |                                                                                                                                                                                                                                                                                         |      |      |
| Archaeal SSU rRNA gene            | Uni515F      | CAGCMGCCGCGGTAA              | 95°C for 15 min, 40× (95°C for 15 s, 60°C for 30 s, 72°C for 45 s)                                                                                                                                                                                                                      | +    | 20   |
|                                   | Arc908r      | CCCGCCAATTCCTTAAAGTT         |                                                                                                                                                                                                                                                                                         |      |      |
| Bacterial <i>amoA</i>             | AmoA1F       | GGGGTTTCTACTGGTGGT           | 95°C for 15 min, 45× (94°C for 15 s, 55°C for 45 s, 72°C for 60 s)                                                                                                                                                                                                                      | +    | 21   |
|                                   | AmoA2R       | CCCCTCKGSAAAGCCTTCTTC        |                                                                                                                                                                                                                                                                                         |      |      |
| Archaeal <i>amoA</i>              | CrenamoA23f  | ATGGTCTGGCTWAGACG            | 95°C for 15 min, 40× (95°C for 30 s, 50°C for 45 s, 72°C for 45 s)                                                                                                                                                                                                                      | +    | 22   |
|                                   | CrenamoA616r | GCCATCCATCTGTATGTCCA         |                                                                                                                                                                                                                                                                                         |      |      |
| Nitrite oxidizer <i>nxrB</i>      | nxB169f      | TACATGTGGTGGAACA             | 95°C for 15 min, 45× (95°C for 15 s, 56.2°C for 40 s, 72°C for 90 s)                                                                                                                                                                                                                    | +    | 23   |
|                                   | nxB638r      | CGGTTCTGGTCRATCA             |                                                                                                                                                                                                                                                                                         |      |      |
| Denitrifier <i>nirS</i>           | nirS_cd3aF   | GTSAACTSAAGGARACSGG          | 95°C for 15 min, 45× (95°C for 15 s, 51°C for 30 s, 72°C for 45 s)                                                                                                                                                                                                                      | +    | 24   |
|                                   | nirS_R3cd    | GASTTCGGRTGSGTCTTGA          |                                                                                                                                                                                                                                                                                         |      |      |
| Denitrifier <i>nirK</i>           | nirK_F1aCu   | ATCATGGTSCTGCCGCG            | 95°C for 15 min, 45× (95°C for 30 s, 56°C for 45 s, 72°C for 45 s, 80°C for 20 s)                                                                                                                                                                                                       | +    | 24   |
|                                   | nirK_R3Cu    | GCCTCGATCAGRTTGTGGTT         |                                                                                                                                                                                                                                                                                         |      |      |
| Nitrate-reducer <i>narG</i>       | narG1960F    | TAYGTSGGSCARGARAA            | 95°C for 5 min, 8× (94°C for 30 s, 59°C (-0.5°C/cycle) for 30 s, 72°C for 45 s), 32 ×(94°C for 30 s, 55°C for 30 s, 72°C for 45 s), 72°C for 10 min                                                                                                                                     | +    | 25   |
|                                   | narG2650R    | TTYTCRTACCABGTBGC            |                                                                                                                                                                                                                                                                                         |      |      |
| Nitrate-reducer <i>napA</i>       | napA V67_F   | TAYTTYTNHSNAARATHATG         | 95°C for 5 min, 40× (94°C for 45 s, 50°C for 45 s, 72°C for 60 s), 72°C for 10 min.                                                                                                                                                                                                     | -    | 26   |
|                                   | napA V67_R   | DATNGGRTGCATYTCNGCCAT<br>RTT |                                                                                                                                                                                                                                                                                         |      |      |
| Denitrifier <i>nosZ</i>           | nosZ-F       | CGYTGTTTCMTCGACAGCCAG        | 95 for 5 min, 1× (94°C for 20 s, 65°C for 30 s, 72°C for 40 s), 2× (94°C for 20 s, 62°C for 30 s, 72°C for 40 s), 3× (94°C for 20 s, 59°C for 30 s, 72°C for 40 s), 5× (94°C for 20 s, 57°C for 30 s, 72°C for 40 s), 24× (94°C for 20 s, 55°C for 30 s, 72°C for 40 s), 72 for 10 min. | -    | 27   |
|                                   | nosZ-R       | CATGTGCAGNGCRTGGCAGAA        |                                                                                                                                                                                                                                                                                         |      |      |
| Sulfate reducer <i>dsrB</i>       | DSRp2060F    | CAACATCGTYCAYACCCAGGG        | 95°C for 15 min, 35× (95°C for 35 s, 54°C for 35 s, 72°C for 30 s, 75°C for 10 s)                                                                                                                                                                                                       | -    | 28   |
|                                   | DSR4R        | GTGTAGCAGTTACCGCA            |                                                                                                                                                                                                                                                                                         |      |      |
| Anammox <i>hzsA</i>               | hzsA_526F    | TAYTTTGAAGGDGACTGG           | 96°C for 15 min, 40× (96°C for 30 s, 55°C for 30s, 72°C for 30 s)                                                                                                                                                                                                                       | -    | 30   |
|                                   | hzsA_1857R   | AAABGGYGAATCATARTGGC         |                                                                                                                                                                                                                                                                                         |      |      |
| DNRA ( <i>nrfA</i> )              | nrfAF2aw     | CARTGYCAYGTBGARTA            | 95°C for 15 min, 35 × (95°C for 30 s, 53°C for 30 s, 72°C for 40 s)                                                                                                                                                                                                                     | -    | 31   |
|                                   | nrfAR1       | TWNGGCATRTGRCARTC            |                                                                                                                                                                                                                                                                                         |      |      |
| Nitrogen fixation ( <i>nifH</i> ) | nifHfw       | GGHAARGGHGGHATHGGNAA<br>RTC  | 94°C for 15 min, 40 × (94°C for 30 s, 55°C for 30 s, 72°C for 1 min)                                                                                                                                                                                                                    | -    | 32   |
|                                   | nifHrv       | GGCATNGCRAANCCVCCRCAN<br>AC  |                                                                                                                                                                                                                                                                                         |      |      |

**Table 6a.** Percentages of various functional groups in the amplicon library from site 3E

| Depth | Ammonia oxidizers        |                     |                      | Nitrite oxidizers |                   |                   | Denitrifiers       |                    |                  |
|-------|--------------------------|---------------------|----------------------|-------------------|-------------------|-------------------|--------------------|--------------------|------------------|
|       | <i>Nitroso pumilales</i> | <i>Nitrosomonas</i> | <i>Nitrosococcus</i> | <i>Nitrospira</i> | <i>Nitrospina</i> | <i>Arcobacter</i> | <i>Woeseiaceae</i> | <i>Pseudomonas</i> | <i>Aeromonas</i> |
| 1H-1  | 21.2%                    | 0.3%                | 2.5%                 | 2.4%              | 4.8%              | --                | 7.8%               | --                 | --               |
| 2H-1  | 11.2%                    | 0.1%                | --                   | 0.2%              | 8.8%              | --                | 0.8%               | --                 | 0.04%            |
| 2H-2  | 11.1%                    | 0.1%                | 0.6%                 | 1.0%              | 5.4%              | 0.2%              | 2.2%               | 0.1%               | --               |
| 2H-4  | 7.5%                     | 0.2%                | 0.1%                 | --                | 6.2%              | 1.2%              | 1.9%               | 0.2%               | 0.14%            |
| 2H-6  | 6.6%                     | 0.2%                | --                   | 0.1%              | --                | 0.8%              | 1.1%               | 0.3%               | --               |
| 3H-3  | 2.4%                     | 0.3%                | --                   | 0.1%              | 2.5%              | 0.2%              | 2.1%               | 1.4%               | --               |
| 3H-6  | 5.9%                     | 0.5%                | 0.1%                 | 0.4%              | 2.5%              | 0.1%              | --                 | 1.1%               | 0.04%            |
| 4H-2  | 8.9%                     | 0.2%                | 0.4%                 | 1.9%              | 3.3%              | 0.2%              | 2.4%               | 0.1%               | --               |
| 4H-3  | 6.0%                     | 0.1%                | 0.2%                 | 0.5%              | 1.1%              | --                | 2.1%               | 0.3%               | 0.05%            |
| 4H-4  | 4.9%                     | --                  | --                   | --                | --                | --                | --                 | 0.2%               | --               |
| 4H-5  | 0.4%                     | 0.2%                | --                   | --                | --                | 0.4%              | --                 | 0.1%               | 0.01%            |
| 4H-6  | 2.5%                     | 0.1%                | --                   | --                | 1.7%              | --                | --                 | 0.1%               | 0.27%            |
| 4H-7  | 2.4%                     | 0.1%                | --                   | --                | 0.1%              | 0.1%              | 0.2%               | 0.3%               | --               |
| 5H-2  | 1.0%                     | 0.1%                | --                   | --                | 1.7%              | 1.1%              | --                 | 0.1%               | --               |
| 5H-4  | 1.5%                     | 0.1%                | --                   | 0.2%              | 0.7%              | 0.8%              | --                 | 1.1%               | --               |
| 5H-6  | 2.6%                     | 0.4%                | --                   | --                | 1.4%              | 0.1%              | --                 | 0.5%               | --               |
| 6H-2  | 2.2%                     | 0.1%                | --                   | --                | 0.7%              | 0.1%              | --                 | 0.1%               | --               |
| 6H-5  | 1.0%                     | 0.3%                | --                   | --                | 0.3%              | 0.5%              | 0.1%               | --                 | --               |
| 6H-6  | 0.9%                     | 0.1%                | --                   | --                | 0.4%              | 0.6%              | 0.2%               | 1.4%               | --               |

**Table S6b.** Percentages of various functional groups in the amplicon library from site 4A

| Depth | Ammonia oxidizers        |                     |                      | Nitrite oxidizers |                   |                   | Denitrifiers       |                    |                  |
|-------|--------------------------|---------------------|----------------------|-------------------|-------------------|-------------------|--------------------|--------------------|------------------|
|       | <i>Nitroso pumilales</i> | <i>Nitrosomonas</i> | <i>Nitrosococcus</i> | <i>Nitrospira</i> | <i>Nitrospina</i> | <i>Arcobacter</i> | <i>Woeseiaceae</i> | <i>Pseudomonas</i> | <i>Aeromonas</i> |
| 1H-1  | 67.9%                    | 0.1%                | 1.8%                 | 0.8%              | 1.9%              | --                | 4.7%               | --                 | --               |
| 1H-2  | 50.7%                    | --                  | 0.1%                 | 0.1%              | 3.1%              | --                | 1.7%               | 0.3%               | --               |
| 1H-3  | 32.0%                    | 0.6%                | --                   | --                | 2.7%              | --                | 0.9%               | 0.6%               | --               |
| 2H-2  | 41.7%                    | --                  | --                   | 0.1%              | 1.4%              | --                | 2.3%               | 0.8%               | --               |
| 2H-6  | --                       | --                  | --                   | --                | --                | --                | --                 | --                 | --               |
| 3H-3  | 20.8%                    | --                  | --                   | --                | 2.0%              | --                | --                 | 3.3%               | --               |
| 3H-6  | 23.0%                    | --                  | --                   | --                | --                | --                | --                 | --                 | --               |
| 4H-2  | 13.9%                    | --                  | --                   | --                | --                | --                | --                 | 5.4%               | --               |
| 4H-4  | 4.0%                     | --                  | --                   | --                | 4.2%              | --                | 3.0%               | 0.02%              | --               |
| 4H-6  | 53.2%                    | --                  | 0.9%                 | 1.1%              | 1.0%              | --                | 4.0%               | 0.3%               | --               |
| 5H-3  | 7.0%                     | --                  | --                   | --                | --                | --                | --                 | 3.6%               | --               |
| 5H-5  | --                       | --                  | --                   | --                | 1.3%              | --                | --                 | --                 | 1.2%             |
| 5H-6  | --                       | --                  | --                   | --                | 0.02%             | --                | --                 | 2.4%               | --               |
| 6H-3  | 7.6%                     | --                  | --                   | --                | --                | --                | --                 | 1.6%               | --               |
| 6H-6  | 15.6%                    | --                  | --                   | --                | 1.4%              | --                | --                 | 3.0%               | --               |
| 7H-2  | 33.3%                    | --                  | --                   | --                | 0.6%              | --                | --                 | 0.8%               | --               |
| 7H-6  | 8.5%                     | --                  | --                   | --                | 1.6%              | --                | --                 | 0.7%               | --               |
| 8H-3  | 3.2%                     | --                  | --                   | --                | 1.8%              | --                | --                 | 0.2%               | 0.2%             |
| 8H-6  | 6.9%                     | --                  | --                   | --                | --                | --                | --                 | 2.9%               | 0.1%             |
| 9H-3  | 1.0%                     | --                  | --                   | --                | --                | --                | --                 | 8.9%               | --               |
| 9H-5  | 0.1%                     | --                  | --                   | --                | --                | --                | --                 | 1.9%               | --               |
| 10H-3 | 39.1%                    | --                  | --                   | --                | --                | --                | --                 | 0.9%               | --               |
| 10H-5 | --                       | --                  | --                   | --                | --                | --                | --                 | 3.9%               | --               |
| 11H-2 | --                       | --                  | --                   | --                | 0.01%             | --                | --                 | 18.2%              | --               |

## Supplementary References

- 1 Soetaert, K., Petzoldt, T. & Meysman, F. (R package version, 2010).
- 2 Treusch, A. H. *et al.* Novel genes for nitrite reductase and Amo-related proteins indicate a role of uncultivated mesophilic crenarchaeota in nitrogen cycling. *Environmental Microbiology* **7**, 1985-1995 (2005).
- 3 Hamady, M., Walker, J. J., Harris, J. K., Gold, N. J. & Knight, R. Error-correcting barcoded primers allow hundreds of samples to be pyrosequenced in multiplex. *Nature methods* **5**, 235 (2008).
- 4 Edgar, R. C. UPARSE: highly accurate OTU sequences from microbial amplicon reads. *Nature methods* **10**, 996-998 (2013).

- 5 Edgar, R. C. Search and clustering orders of magnitude faster than BLAST. *Bioinformatics* **26**, 2460-2461 (2010).
- 6 Jørgensen, S. L. & Zhao, R. Microbial inventory of deeply buried oceanic crust from a young ridge flank. *Frontiers in Microbiology* **7**, 820 (2016).
- 7 Lanzen, A. *et al.* CREST - Classification resources for environmental sequence tags. *PLoS One* **7**, e49334 (2012).
- 8 Oksanen, J. *et al.* The vegan package. *Community ecology package* **10**, 631-637 (2007).
- 9 Galili, T. dendextend: an R package for visualizing, adjusting and comparing trees of hierarchical clustering. *Bioinformatics* **31**, 3718-3720 (2015).
- 10 Katoh, K. & Standley, D. M. MAFFT Multiple Sequence Alignment Software Version 7: Improvements in Performance and Usability. *Molecular Biology and Evolution* **30**, 772-780, (2013).
- 11 Stamatakis, A. RAxML-VI-HPC: maximum likelihood-based phylogenetic analyses with thousands of taxa and mixed models. *Bioinformatics* **22**, 2688-2690 (2006).
- 12 Boudreau, B. P. & Ruddick, B. R. On a reactive continuum representation of organic matter diagenesis. *American Journal of Science* **291**, 507-538 (1991).
- 13 Ziebis, W. *et al.* Interstitial fluid chemistry of sediments underlying the North Atlantic gyre and the influence of subsurface fluid flow. *Earth and Planetary Science Letters* **323**, 79-91 (2012).
- 14 Expedition;336;Scientists. Sediment and basement contact coring. In *Edwards, K.J., Bach, W., Klaus, A., and the Expedition 336 Scientists, Proc. IODP, 336: Tokyo (Integrated Ocean Drilling Program Management International, Inc.)*, (2012).
- 15 Jørgensen, B. B. & Marshall, I. P. G. in *Annual Review of Marine Science* Vol. 8 (eds C. A. Carlson & S. J. Giovannoni) 311-332 (2016).
- 16 D'Hondt, S. *et al.* Subseafloor sedimentary life in the South Pacific Gyre. *Proceedings of the National Academy of Sciences of the United States of America* **106**, 11651-11656 (2009).
- 17 Billen, G. Evaluation of nitrifying activity in sediments by dark <sup>14</sup>C-bicarbonate incorporation. *Water Research* **10**, 51-57 (1976).
- 18 Wuchter, C. *et al.* Archaeal nitrification in the ocean. *Proceedings of the National Academy of Sciences of the United States of America* **103**, 12317-12322 (2006).
- 19 Jørgensen, S. L. *et al.* Correlating microbial community profiles with geochemical data in highly stratified sediments from the Arctic Mid-Ocean Ridge. *Proceedings of the National Academy of Sciences of the United States of America* **109**, 2846-2855 (2012).
- 20 Ovreås, L., Forney, L., Daae, F. L. & Torsvik, V. Distribution of bacterioplankton in meromictic Lake Saelenvannet, as determined by denaturing gradient gel electrophoresis of PCR-amplified gene fragments coding for 16S rRNA. *Appl. Environ. Microbiol.* **63**, 3367-3373 (1997).
- 21 Rotthauwe, J. H., Witzel, K. P. & Liesack, W. The ammonia monooxygenase structural gene amoA as a functional marker: Molecular fine-scale analysis of natural ammonia-oxidizing populations. *Appl. Environ. Microbiol.* **63**, 4704-4712 (1997).
- 22 Tourna, M., Freitag, T. E., Nicol, G. W. & Prosser, J. I. Growth, activity and temperature responses of ammonia-oxidizing archaea and bacteria in soil microcosms. *Environmental Microbiology* **10**, 1357-1364 (2008).
- 23 Pester, M. *et al.* NxrB encoding the beta subunit of nitrite oxidoreductase as functional and phylogenetic marker for nitrite - oxidizing Nitrospira. *Environmental microbiology* **16**, 3055-3071 (2014).

- 24 Throback, I. N., Enwall, K., Jarvis, A. & Hallin, S. Reassessing PCR primers targeting nirS, nirK and nosZ genes for community surveys of denitrifying bacteria with DGGE. *FEMS Microbiol. Ecol.* **49**, 401-417 (2004).
- 25 Philippot, L., Piutti, S., Martin-Laurent, F., Hallet, S. & Germon, J. C. Molecular analysis of the nitrate-reducing community from unplanted and maize-planted soils. *Appl. Environ. Microbiol.* **68**, 6121-6128 (2002).
- 26 Lam, P. *et al.* Revising the nitrogen cycle in the Peruvian oxygen minimum zone. *Proceedings of the National Academy of Sciences of the United States of America* **106**, 4752-4757 (2009).
- 27 Kloos, K., Mergel, A., Rosch, C. & Bothe, H. Denitrification within the genus *Azospirillum* and other associative bacteria. *Australian Journal of Plant Physiology* **28**, 991-998 (2001).
- 28 Wagner, M., Roger, A. J., Flax, J. L., Brusseau, G. A. & Stahl, D. A. Phylogeny of dissimilatory sulfite reductases supports an early origin of sulfate respiration. *Journal of Bacteriology* **180**, 2975-2982 (1998).
- 29 Geets, J. *et al.* DsrB gene-based DGGE for community and diversity surveys of sulfate-reducing bacteria. *Journal of Microbiological Methods* **66**, 194-205 (2006).
- 30 Harhangi, H. R. *et al.* Hydrazine synthase, a unique phylomarker with which to study the presence and biodiversity of anammox bacteria. *Appl. Environ. Microbiol.* **78**, 752-758 (2012).
- 31 Welsh, A., Chee-Sanford, J. C., Connor, L. M., Loeffler, F. E. & Sanford, R. A. Refined NrfA phylogeny improves PCR-based nrfA gene detection. *Appl. Environ. Microbiol.* **80**, 2110-2119 (2014).
- 32 Mehta, M. P., Butterfield, D. A. & Baross, J. A. Phylogenetic diversity of nitrogenase (nifH) genes in deep-sea and hydrothermal vent environments of the Juan de Fuca ridge. *Appl. Environ. Microbiol.* **69**, 960-970 (2003).
